# Supplementary material for: Laryngeal evidence for the first and second passaggio in professionally trained sopranos
Source: PLoS One. 2017 May 3;12(5):e0175865. doi: 10.1371/journal.pone.0175865 (PMC5414960; doi:10.1371/journal.pone.0175865)
Supplement: S2 Excel — (CSV) [file pone.0175865.s015.csv]

Condition	Window index	Participant	OQ_GAW
first passaggio	-5	S1	0.529000
first passaggio	-4	S1	0.574000
first passaggio	-3	S1	0.589000
first passaggio	-2	S1	0.592000
first passaggio	-1	S1	0.578000
first passaggio	0	S1	0.609000
first passaggio	1	S1	0.689000
first passaggio	2	S1	0.721000
first passaggio	3	S1	0.748000
first passaggio	4	S1	0.717000
first passaggio	5	S1	0.757000
first passaggio	-5	S2	0.633000
first passaggio	-4	S2	0.647000
first passaggio	-3	S2	0.677000
first passaggio	-2	S2	0.697000
first passaggio	-1	S2	0.686000
first passaggio	0	S2	0.663000
first passaggio	1	S2	0.652000
first passaggio	2	S2	0.665000
first passaggio	3	S2	0.685000
first passaggio	4	S2	0.718000
first passaggio	5	S2	0.704000
first passaggio	-5	S3	0.551000
first passaggio	-4	S3	0.531000
first passaggio	-3	S3	0.548000
first passaggio	-2	S3	0.557000
first passaggio	-1	S3	0.583000
first passaggio	0	S3	0.524000
first passaggio	1	S3	0.438000
first passaggio	2	S3	0.361000
first passaggio	3	S3	0.355000
first passaggio	4	S3	0.374000
first passaggio	5	S3	0.377000
first passaggio	-5	S4	0.567000
first passaggio	-4	S4	0.563000
first passaggio	-3	S4	0.571000
first passaggio	-2	S4	0.588000
first passaggio	-1	S4	0.635000
first passaggio	0	S4	0.712000
first passaggio	1	S4	0.744000
first passaggio	2	S4	0.722000
first passaggio	3	S4	0.714000
first passaggio	4	S4	0.723000
first passaggio	5	S4	0.732000
first passaggio	-5	S5	0.651000
first passaggio	-4	S5	0.652000
first passaggio	-3	S5	0.672000
first passaggio	-2	S5	0.697000
first passaggio	-1	S5	0.715000
first passaggio	0	S5	0.742000
first passaggio	1	S5	0.842000
first passaggio	2	S5	0.951000
first passaggio	3	S5	0.833000
first passaggio	4	S5	0.769000
first passaggio	5	S5	0.742000
first passaggio	-5	S6	nan
first passaggio	-4	S6	nan
first passaggio	-3	S6	nan
first passaggio	-2	S6	nan
first passaggio	-1	S6	nan
first passaggio	0	S6	nan
first passaggio	1	S6	nan
first passaggio	2	S6	nan
first passaggio	3	S6	nan
first passaggio	4	S6	nan
first passaggio	5	S6	nan
first passaggio	-5	S7	0.684000
first passaggio	-4	S7	0.677000
first passaggio	-3	S7	0.658000
first passaggio	-2	S7	0.571000
first passaggio	-1	S7	0.596000
first passaggio	0	S7	0.678000
first passaggio	1	S7	0.721000
first passaggio	2	S7	0.712000
first passaggio	3	S7	0.709000
first passaggio	4	S7	0.717000
first passaggio	5	S7	0.713000
first passaggio	-5	S8	0.494000
first passaggio	-4	S8	0.452000
first passaggio	-3	S8	0.441000
first passaggio	-2	S8	0.422000
first passaggio	-1	S8	0.423000
first passaggio	0	S8	0.556000
first passaggio	1	S8	0.717000
first passaggio	2	S8	0.802000
first passaggio	3	S8	0.847000
first passaggio	4	S8	0.833000
first passaggio	5	S8	0.780000
first passaggio	-5	S9	0.693000
first passaggio	-4	S9	0.714000
first passaggio	-3	S9	0.709000
first passaggio	-2	S9	0.684000
first passaggio	-1	S9	0.611000
first passaggio	0	S9	0.606000
first passaggio	1	S9	0.693000
first passaggio	2	S9	0.697000
first passaggio	3	S9	0.685000
first passaggio	4	S9	0.661000
first passaggio	5	S9	0.667000
first passaggio	-5	S10	0.557000
first passaggio	-4	S10	0.580000
first passaggio	-3	S10	0.546000
first passaggio	-2	S10	0.549000
first passaggio	-1	S10	0.531000
first passaggio	0	S10	0.504000
first passaggio	1	S10	0.521000
first passaggio	2	S10	0.525000
first passaggio	3	S10	0.532000
first passaggio	4	S10	0.513000
first passaggio	5	S10	0.533000
second passaggio	-5	S1	0.628000
second passaggio	-4	S1	0.603000
second passaggio	-3	S1	0.553000
second passaggio	-2	S1	0.551000
second passaggio	-1	S1	0.522000
second passaggio	0	S1	0.555000
second passaggio	1	S1	0.625000
second passaggio	2	S1	0.615000
second passaggio	3	S1	0.630000
second passaggio	4	S1	0.649000
second passaggio	5	S1	0.634000
second passaggio	-5	S2	0.669000
second passaggio	-4	S2	0.672000
second passaggio	-3	S2	0.831000
second passaggio	-2	S2	0.904000
second passaggio	-1	S2	0.874000
second passaggio	0	S2	0.924000
second passaggio	1	S2	1.000000
second passaggio	2	S2	1.000000
second passaggio	3	S2	1.000000
second passaggio	4	S2	0.977000
second passaggio	5	S2	0.911000
second passaggio	-5	S3	0.567000
second passaggio	-4	S3	0.561000
second passaggio	-3	S3	0.616000
second passaggio	-2	S3	0.643000
second passaggio	-1	S3	0.644000
second passaggio	0	S3	0.683000
second passaggio	1	S3	0.665000
second passaggio	2	S3	0.667000
second passaggio	3	S3	0.691000
second passaggio	4	S3	0.638000
second passaggio	5	S3	0.635000
second passaggio	-5	S4	0.600000
second passaggio	-4	S4	0.572000
second passaggio	-3	S4	0.563000
second passaggio	-2	S4	0.576000
second passaggio	-1	S4	0.666000
second passaggio	0	S4	0.747000
second passaggio	1	S4	1.000000
second passaggio	2	S4	1.000000
second passaggio	3	S4	1.000000
second passaggio	4	S4	1.000000
second passaggio	5	S4	1.000000
second passaggio	-5	S5	0.657000
second passaggio	-4	S5	0.631000
second passaggio	-3	S5	0.628000
second passaggio	-2	S5	0.635000
second passaggio	-1	S5	0.665000
second passaggio	0	S5	0.699000
second passaggio	1	S5	0.719000
second passaggio	2	S5	0.758000
second passaggio	3	S5	0.886000
second passaggio	4	S5	0.898000
second passaggio	5	S5	0.923000
second passaggio	-5	S6	0.483000
second passaggio	-4	S6	0.463000
second passaggio	-3	S6	0.459000
second passaggio	-2	S6	0.471000
second passaggio	-1	S6	0.474000
second passaggio	0	S6	0.572000
second passaggio	1	S6	0.426000
second passaggio	2	S6	0.420000
second passaggio	3	S6	0.420000
second passaggio	4	S6	0.420000
second passaggio	5	S6	0.420000
second passaggio	-5	S7	0.636000
second passaggio	-4	S7	0.638000
second passaggio	-3	S7	0.641000
second passaggio	-2	S7	0.634000
second passaggio	-1	S7	0.663000
second passaggio	0	S7	0.623000
second passaggio	1	S7	0.623000
second passaggio	2	S7	0.657000
second passaggio	3	S7	0.671000
second passaggio	4	S7	0.732000
second passaggio	5	S7	0.721000
second passaggio	-5	S8	0.658000
second passaggio	-4	S8	0.653000
second passaggio	-3	S8	0.655000
second passaggio	-2	S8	0.661000
second passaggio	-1	S8	0.658000
second passaggio	0	S8	0.721000
second passaggio	1	S8	0.755000
second passaggio	2	S8	0.808000
second passaggio	3	S8	0.806000
second passaggio	4	S8	0.848000
second passaggio	5	S8	0.845000
second passaggio	-5	S9	0.694000
second passaggio	-4	S9	0.677000
second passaggio	-3	S9	0.673000
second passaggio	-2	S9	0.668000
second passaggio	-1	S9	0.687000
second passaggio	0	S9	0.734000
second passaggio	1	S9	0.721000
second passaggio	2	S9	0.708000
second passaggio	3	S9	0.779000
second passaggio	4	S9	0.827000
second passaggio	5	S9	0.721000
second passaggio	-5	S10	0.558000
second passaggio	-4	S10	0.555000
second passaggio	-3	S10	0.550000
second passaggio	-2	S10	0.594000
second passaggio	-1	S10	0.761000
second passaggio	0	S10	0.982000
second passaggio	1	S10	0.997000
second passaggio	2	S10	0.786000
second passaggio	3	S10	0.502000
second passaggio	4	S10	0.672000
second passaggio	5	S10	0.995000
Condition	Window index	Participant	delta OQ_GAW
first passaggio	-5 to -4	S1	0.045000
first passaggio	-4 to -3	S1	0.015000
first passaggio	-3 to -2	S1	0.003000
first passaggio	-2 to -1	S1	-0.014000
first passaggio	-1 to 0	S1	0.031000
first passaggio	0 to 1	S1	0.080000
first passaggio	1 to 2	S1	0.032000
first passaggio	2 to 3	S1	0.027000
first passaggio	3 to 4	S1	-0.031000
first passaggio	4 to 5	S1	0.040000
first passaggio	-5 to -4	S2	0.014000
first passaggio	-4 to -3	S2	0.030000
first passaggio	-3 to -2	S2	0.020000
first passaggio	-2 to -1	S2	-0.011000
first passaggio	-1 to 0	S2	-0.023000
first passaggio	0 to 1	S2	-0.011000
first passaggio	1 to 2	S2	0.013000
first passaggio	2 to 3	S2	0.020000
first passaggio	3 to 4	S2	0.033000
first passaggio	4 to 5	S2	-0.014000
first passaggio	-5 to -4	S3	-0.020000
first passaggio	-4 to -3	S3	0.017000
first passaggio	-3 to -2	S3	0.009000
first passaggio	-2 to -1	S3	0.026000
first passaggio	-1 to 0	S3	-0.059000
first passaggio	0 to 1	S3	-0.086000
first passaggio	1 to 2	S3	-0.077000
first passaggio	2 to 3	S3	-0.006000
first passaggio	3 to 4	S3	0.019000
first passaggio	4 to 5	S3	0.003000
first passaggio	-5 to -4	S4	-0.004000
first passaggio	-4 to -3	S4	0.008000
first passaggio	-3 to -2	S4	0.017000
first passaggio	-2 to -1	S4	0.047000
first passaggio	-1 to 0	S4	0.077000
first passaggio	0 to 1	S4	0.032000
first passaggio	1 to 2	S4	-0.022000
first passaggio	2 to 3	S4	-0.008000
first passaggio	3 to 4	S4	0.009000
first passaggio	4 to 5	S4	0.009000
first passaggio	-5 to -4	S5	0.001000
first passaggio	-4 to -3	S5	0.020000
first passaggio	-3 to -2	S5	0.025000
first passaggio	-2 to -1	S5	0.018000
first passaggio	-1 to 0	S5	0.027000
first passaggio	0 to 1	S5	0.100000
first passaggio	1 to 2	S5	0.109000
first passaggio	2 to 3	S5	-0.118000
first passaggio	3 to 4	S5	-0.064000
first passaggio	4 to 5	S5	-0.027000
first passaggio	-5 to -4	S6	nan
first passaggio	-4 to -3	S6	nan
first passaggio	-3 to -2	S6	nan
first passaggio	-2 to -1	S6	nan
first passaggio	-1 to 0	S6	nan
first passaggio	0 to 1	S6	nan
first passaggio	1 to 2	S6	nan
first passaggio	2 to 3	S6	nan
first passaggio	3 to 4	S6	nan
first passaggio	4 to 5	S6	nan
first passaggio	-5 to -4	S7	-0.007000
first passaggio	-4 to -3	S7	-0.019000
first passaggio	-3 to -2	S7	-0.087000
first passaggio	-2 to -1	S7	0.025000
first passaggio	-1 to 0	S7	0.082000
first passaggio	0 to 1	S7	0.043000
first passaggio	1 to 2	S7	-0.009000
first passaggio	2 to 3	S7	-0.003000
first passaggio	3 to 4	S7	0.008000
first passaggio	4 to 5	S7	-0.004000
first passaggio	-5 to -4	S8	-0.042000
first passaggio	-4 to -3	S8	-0.011000
first passaggio	-3 to -2	S8	-0.019000
first passaggio	-2 to -1	S8	0.001000
first passaggio	-1 to 0	S8	0.133000
first passaggio	0 to 1	S8	0.161000
first passaggio	1 to 2	S8	0.085000
first passaggio	2 to 3	S8	0.045000
first passaggio	3 to 4	S8	-0.014000
first passaggio	4 to 5	S8	-0.053000
first passaggio	-5 to -4	S9	0.021000
first passaggio	-4 to -3	S9	-0.005000
first passaggio	-3 to -2	S9	-0.025000
first passaggio	-2 to -1	S9	-0.073000
first passaggio	-1 to 0	S9	-0.005000
first passaggio	0 to 1	S9	0.087000
first passaggio	1 to 2	S9	0.004000
first passaggio	2 to 3	S9	-0.012000
first passaggio	3 to 4	S9	-0.024000
first passaggio	4 to 5	S9	0.006000
first passaggio	-5 to -4	S10	0.023000
first passaggio	-4 to -3	S10	-0.034000
first passaggio	-3 to -2	S10	0.003000
first passaggio	-2 to -1	S10	-0.018000
first passaggio	-1 to 0	S10	-0.027000
first passaggio	0 to 1	S10	0.017000
first passaggio	1 to 2	S10	0.004000
first passaggio	2 to 3	S10	0.007000
first passaggio	3 to 4	S10	-0.019000
first passaggio	4 to 5	S10	0.020000
second passaggio	-5 to -4	S1	-0.025000
second passaggio	-4 to -3	S1	-0.050000
second passaggio	-3 to -2	S1	-0.002000
second passaggio	-2 to -1	S1	-0.029000
second passaggio	-1 to 0	S1	0.033000
second passaggio	0 to 1	S1	0.070000
second passaggio	1 to 2	S1	-0.010000
second passaggio	2 to 3	S1	0.015000
second passaggio	3 to 4	S1	0.019000
second passaggio	4 to 5	S1	-0.015000
second passaggio	-5 to -4	S2	0.003000
second passaggio	-4 to -3	S2	0.159000
second passaggio	-3 to -2	S2	0.073000
second passaggio	-2 to -1	S2	-0.030000
second passaggio	-1 to 0	S2	0.050000
second passaggio	0 to 1	S2	0.076000
second passaggio	1 to 2	S2	0.000000
second passaggio	2 to 3	S2	0.000000
second passaggio	3 to 4	S2	-0.023000
second passaggio	4 to 5	S2	-0.066000
second passaggio	-5 to -4	S3	-0.006000
second passaggio	-4 to -3	S3	0.055000
second passaggio	-3 to -2	S3	0.027000
second passaggio	-2 to -1	S3	0.001000
second passaggio	-1 to 0	S3	0.039000
second passaggio	0 to 1	S3	-0.018000
second passaggio	1 to 2	S3	0.002000
second passaggio	2 to 3	S3	0.024000
second passaggio	3 to 4	S3	-0.053000
second passaggio	4 to 5	S3	-0.003000
second passaggio	-5 to -4	S4	-0.028000
second passaggio	-4 to -3	S4	-0.009000
second passaggio	-3 to -2	S4	0.013000
second passaggio	-2 to -1	S4	0.090000
second passaggio	-1 to 0	S4	0.081000
second passaggio	0 to 1	S4	0.253000
second passaggio	1 to 2	S4	0.000000
second passaggio	2 to 3	S4	0.000000
second passaggio	3 to 4	S4	0.000000
second passaggio	4 to 5	S4	0.000000
second passaggio	-5 to -4	S5	-0.026000
second passaggio	-4 to -3	S5	-0.003000
second passaggio	-3 to -2	S5	0.007000
second passaggio	-2 to -1	S5	0.030000
second passaggio	-1 to 0	S5	0.034000
second passaggio	0 to 1	S5	0.020000
second passaggio	1 to 2	S5	0.039000
second passaggio	2 to 3	S5	0.128000
second passaggio	3 to 4	S5	0.012000
second passaggio	4 to 5	S5	0.025000
second passaggio	-5 to -4	S6	-0.020000
second passaggio	-4 to -3	S6	-0.004000
second passaggio	-3 to -2	S6	0.012000
second passaggio	-2 to -1	S6	0.003000
second passaggio	-1 to 0	S6	0.098000
second passaggio	0 to 1	S6	-0.146000
second passaggio	1 to 2	S6	-0.006000
second passaggio	2 to 3	S6	0.000000
second passaggio	3 to 4	S6	0.000000
second passaggio	4 to 5	S6	0.000000
second passaggio	-5 to -4	S7	0.002000
second passaggio	-4 to -3	S7	0.003000
second passaggio	-3 to -2	S7	-0.007000
second passaggio	-2 to -1	S7	0.029000
second passaggio	-1 to 0	S7	-0.040000
second passaggio	0 to 1	S7	0.000000
second passaggio	1 to 2	S7	0.034000
second passaggio	2 to 3	S7	0.014000
second passaggio	3 to 4	S7	0.061000
second passaggio	4 to 5	S7	-0.011000
second passaggio	-5 to -4	S8	-0.005000
second passaggio	-4 to -3	S8	0.002000
second passaggio	-3 to -2	S8	0.006000
second passaggio	-2 to -1	S8	-0.003000
second passaggio	-1 to 0	S8	0.063000
second passaggio	0 to 1	S8	0.034000
second passaggio	1 to 2	S8	0.053000
second passaggio	2 to 3	S8	-0.002000
second passaggio	3 to 4	S8	0.042000
second passaggio	4 to 5	S8	-0.003000
second passaggio	-5 to -4	S9	-0.017000
second passaggio	-4 to -3	S9	-0.004000
second passaggio	-3 to -2	S9	-0.005000
second passaggio	-2 to -1	S9	0.019000
second passaggio	-1 to 0	S9	0.047000
second passaggio	0 to 1	S9	-0.013000
second passaggio	1 to 2	S9	-0.013000
second passaggio	2 to 3	S9	0.071000
second passaggio	3 to 4	S9	0.048000
second passaggio	4 to 5	S9	-0.106000
second passaggio	-5 to -4	S10	-0.003000
second passaggio	-4 to -3	S10	-0.005000
second passaggio	-3 to -2	S10	0.044000
second passaggio	-2 to -1	S10	0.167000
second passaggio	-1 to 0	S10	0.221000
second passaggio	0 to 1	S10	0.015000
second passaggio	1 to 2	S10	-0.211000
second passaggio	2 to 3	S10	-0.284000
second passaggio	3 to 4	S10	0.170000
second passaggio	4 to 5	S10	0.323000
